# Supplementary material for: Modified Gegen Qinlian Decoction Regulates Treg/Th17 Balance to Ameliorate DSS-Induced Acute Experimental Colitis in Mice by Altering the Gut Microbiota
Source: PubMed Central journal article supplement (PMC8601377; doi:10.3389/fphar.2021.756978), 2021-11-04

# Treg-Spleen

## Control

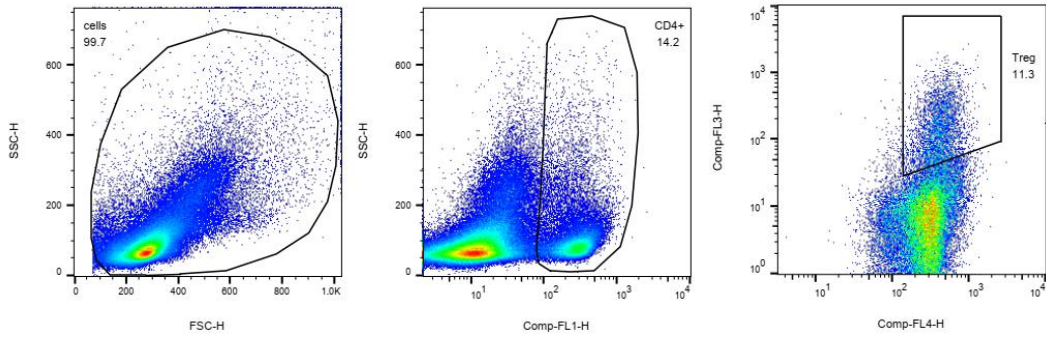

## DSS

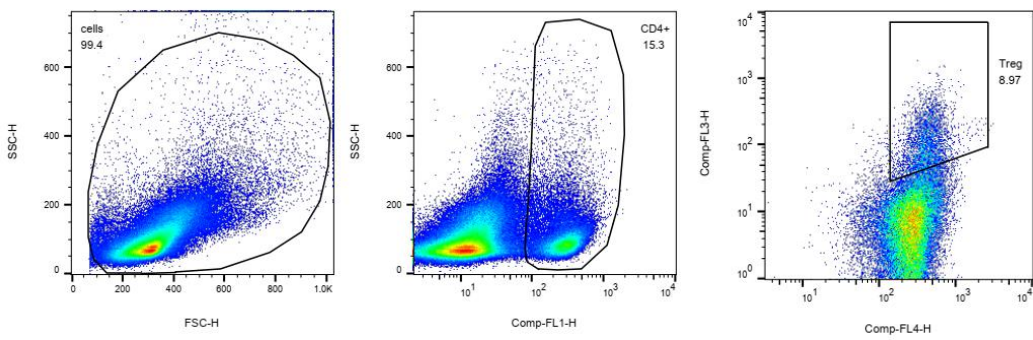

## GL

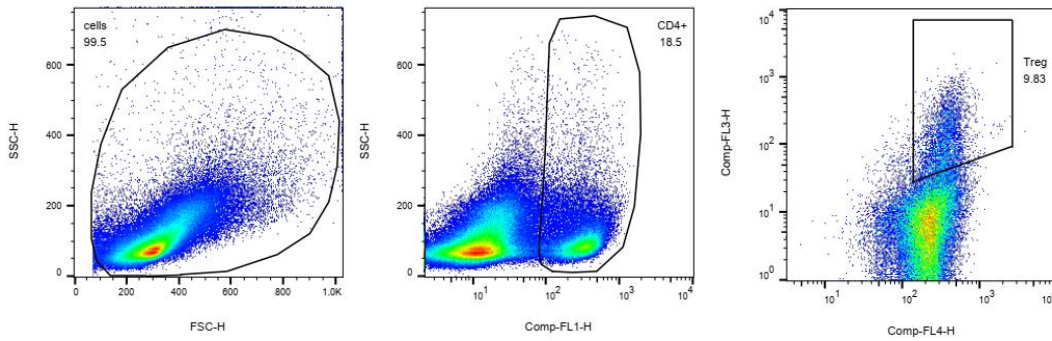

## GM

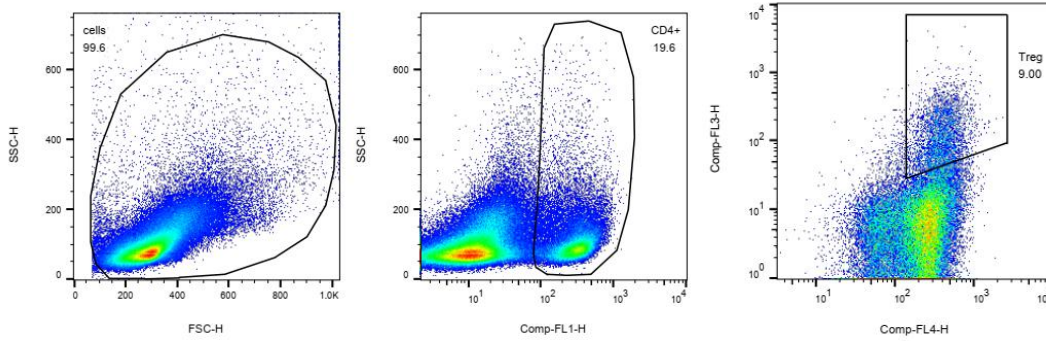

### GH

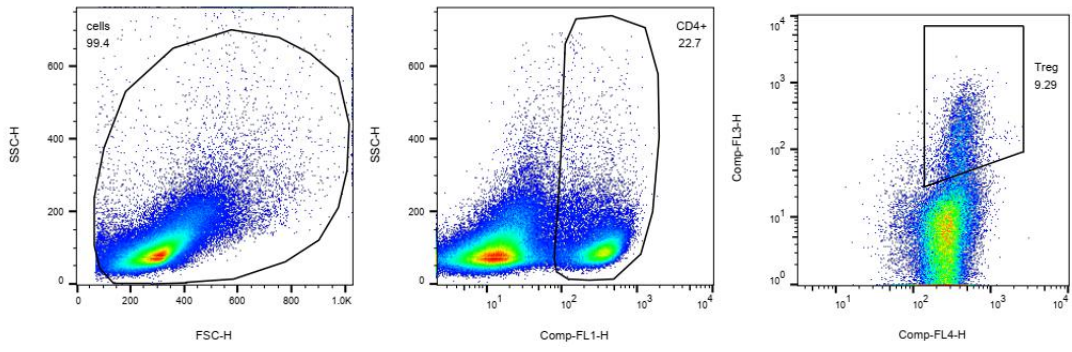

### 5-ASA

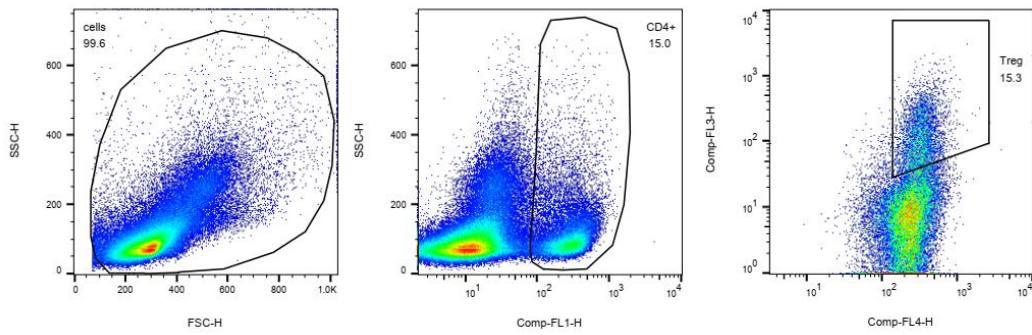

### Treg-MLN

#### Control

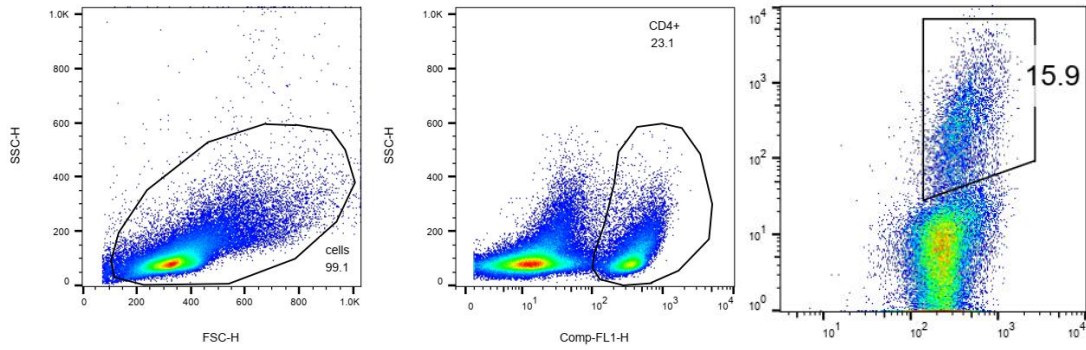

#### DSS

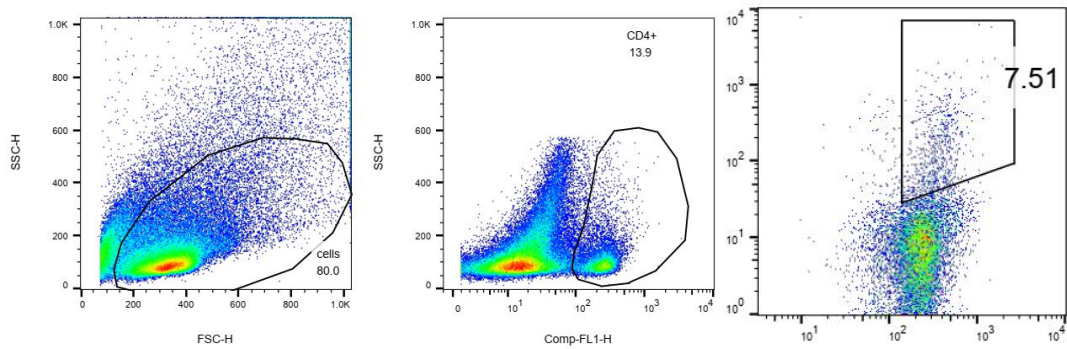



### GL

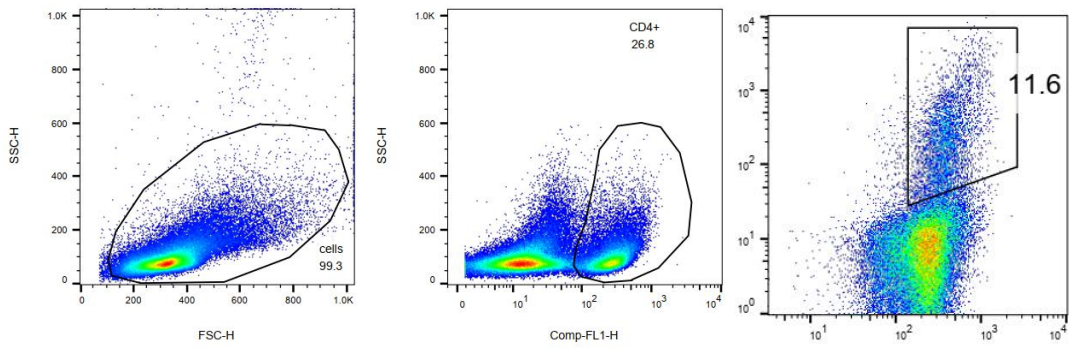

### GM

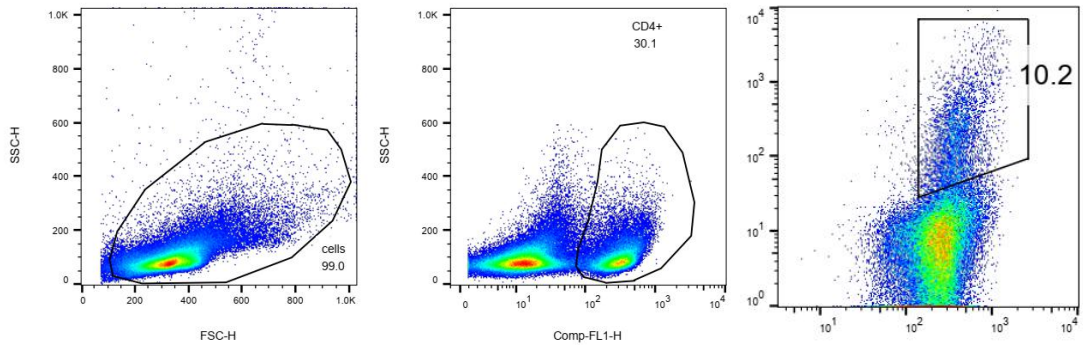

### GH

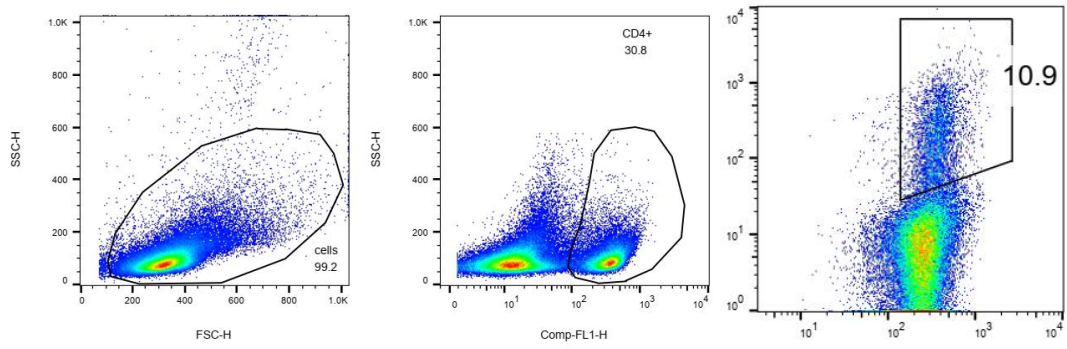

### 5-ASA

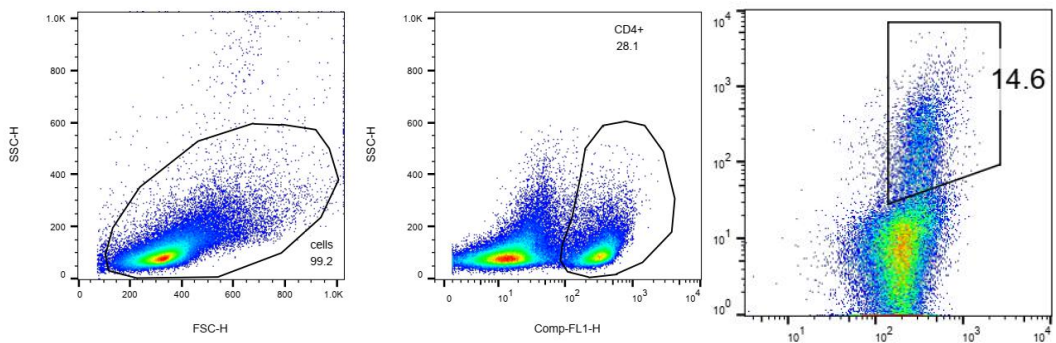

# Th17-Spleen

## Control

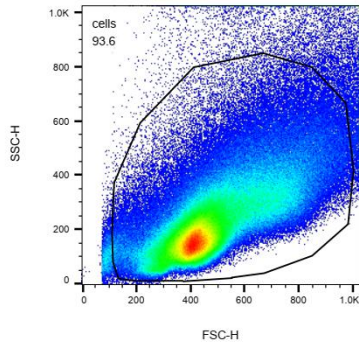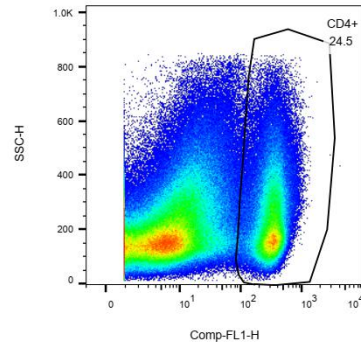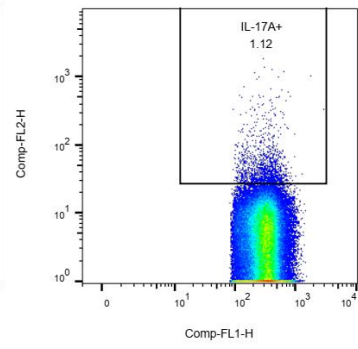

## DSS

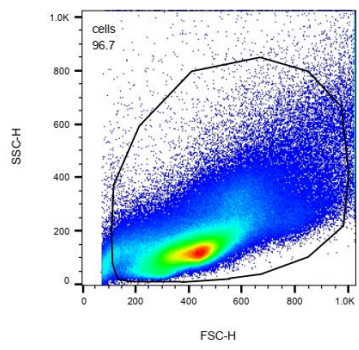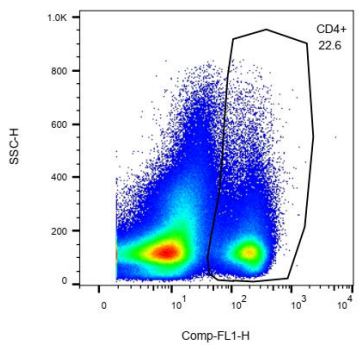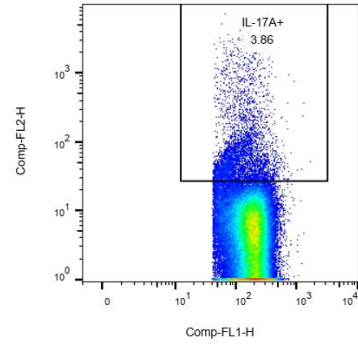

## GL

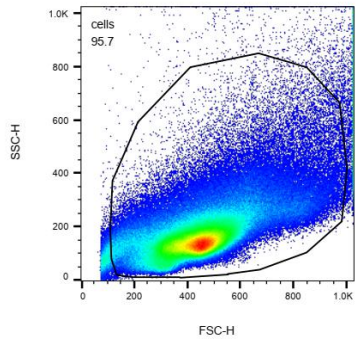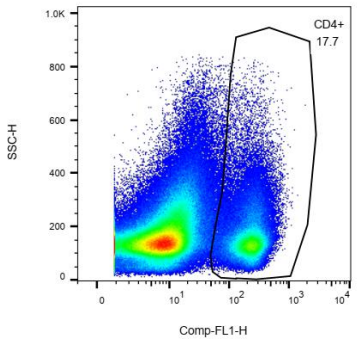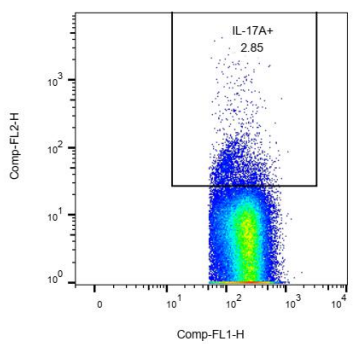

## GM

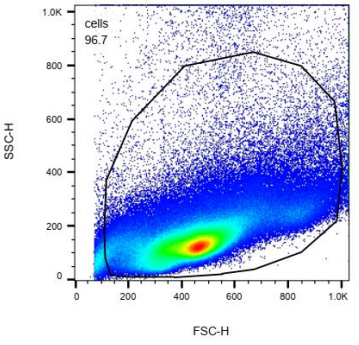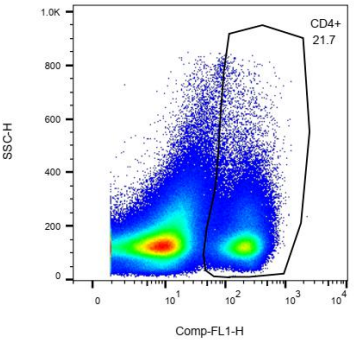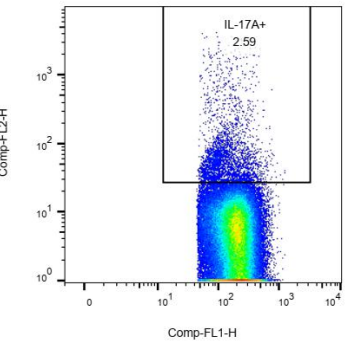



### GH

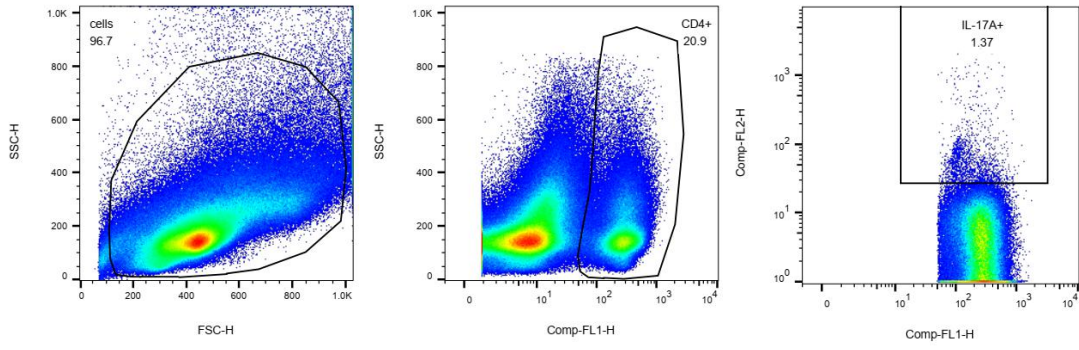

### 5-ASA

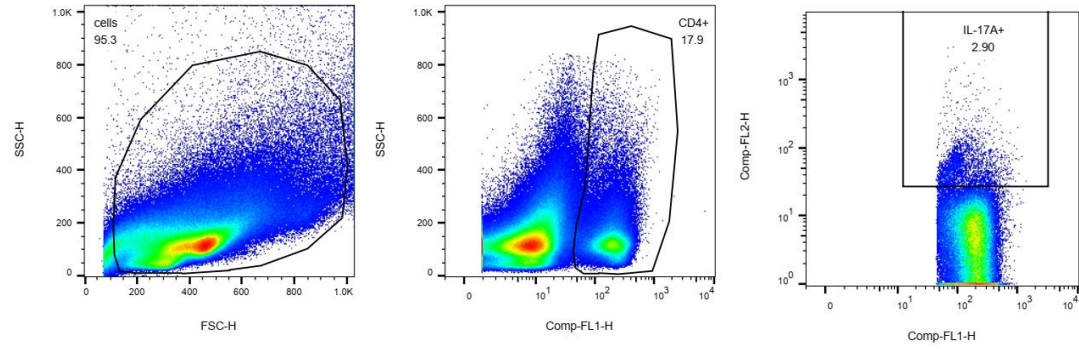

### Th17-MLN

### Control

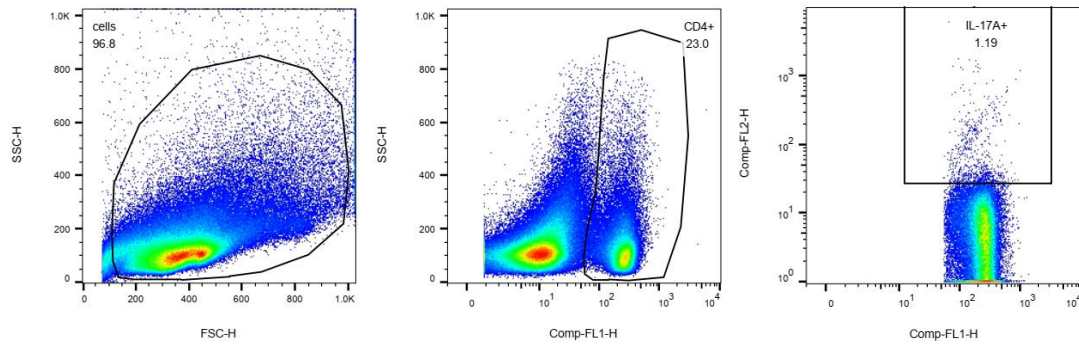

### DSS

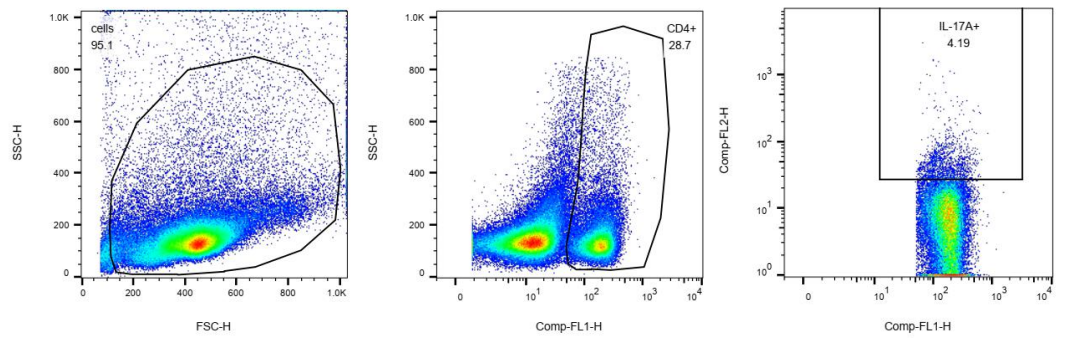

### GL

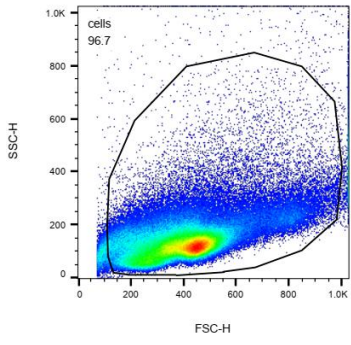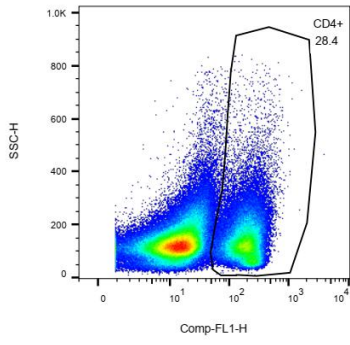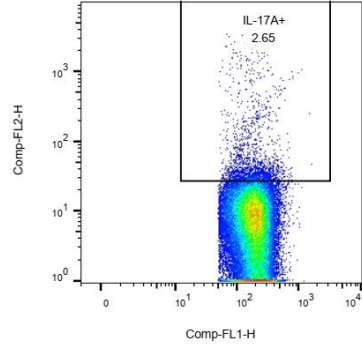

### GM

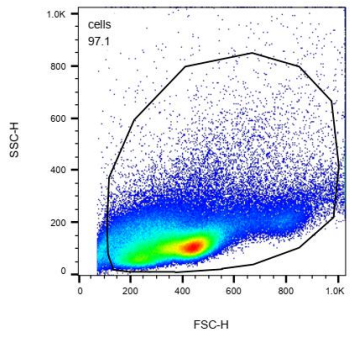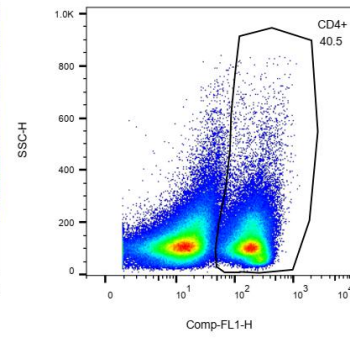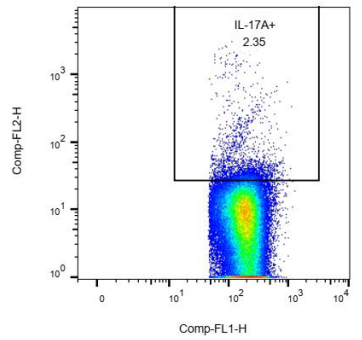

### GH

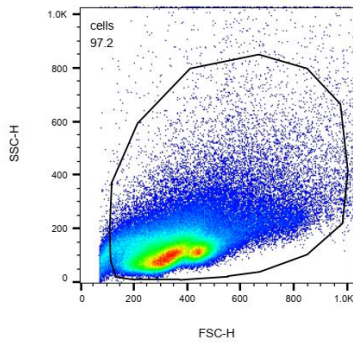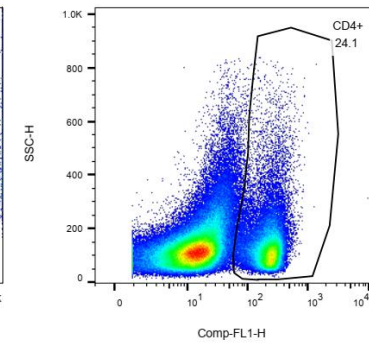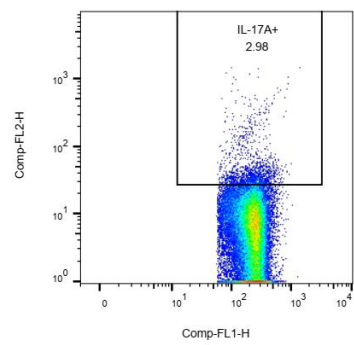

### 5-ASA

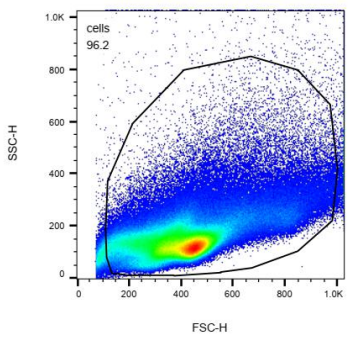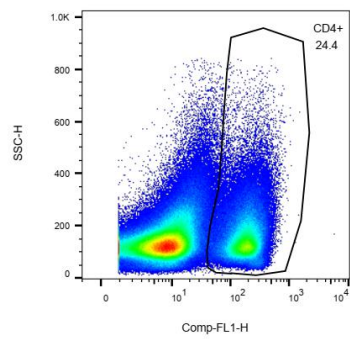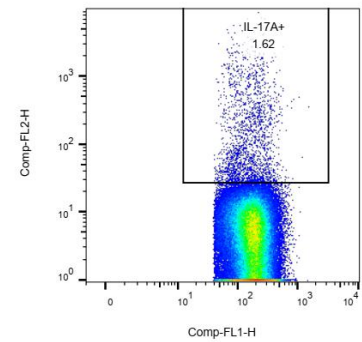



## Treg-Spleen

### ABX

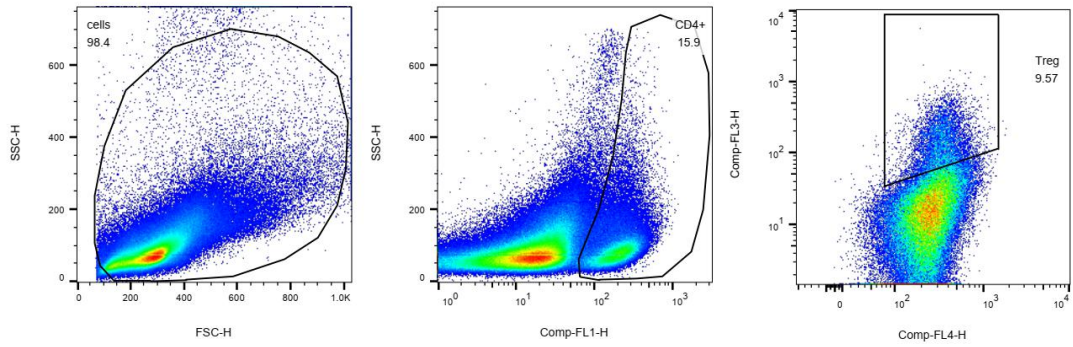

### ABS(DSS)

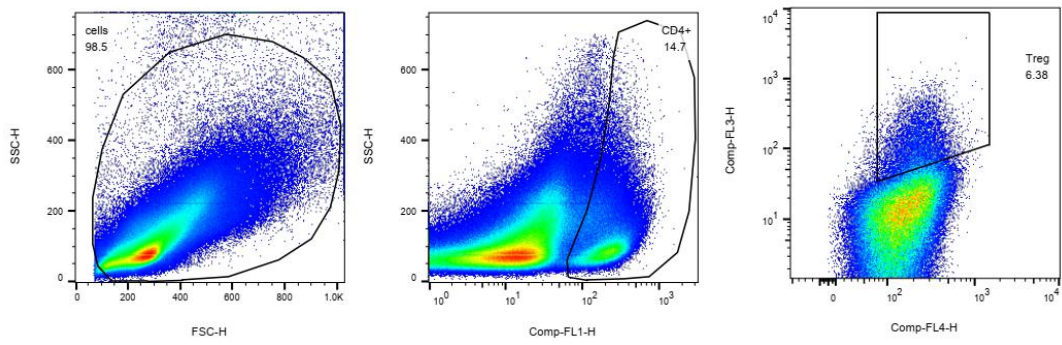

### ABX(DSS+GH)

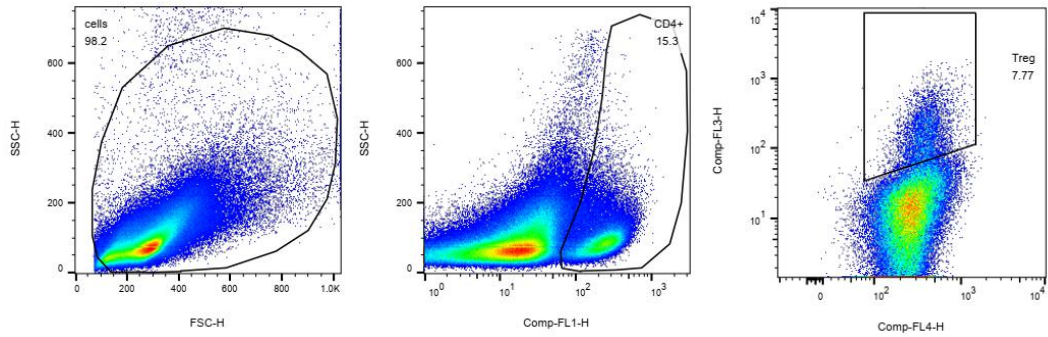

## Treg-MLN

### ABX

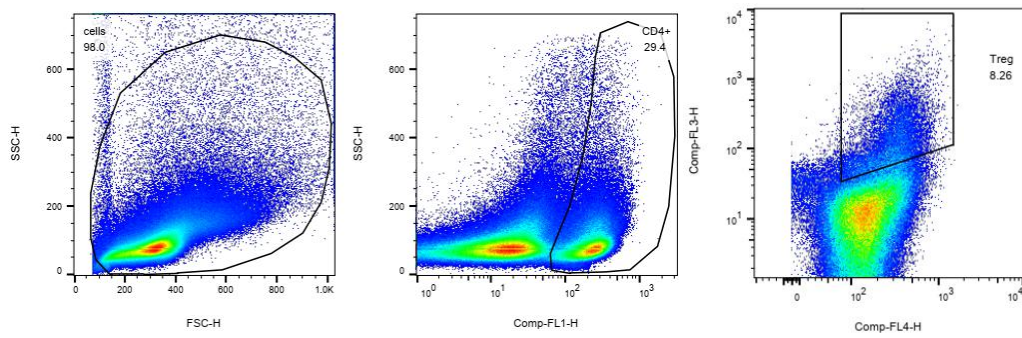

### ABX(DSS)

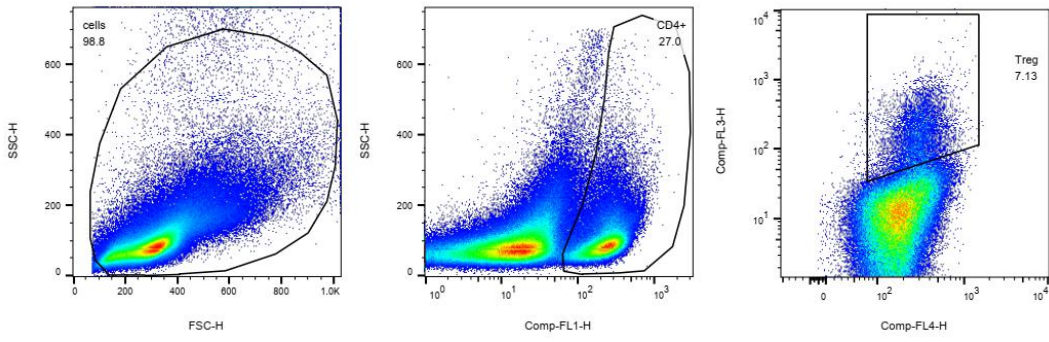

### ABX(DSS+GH)

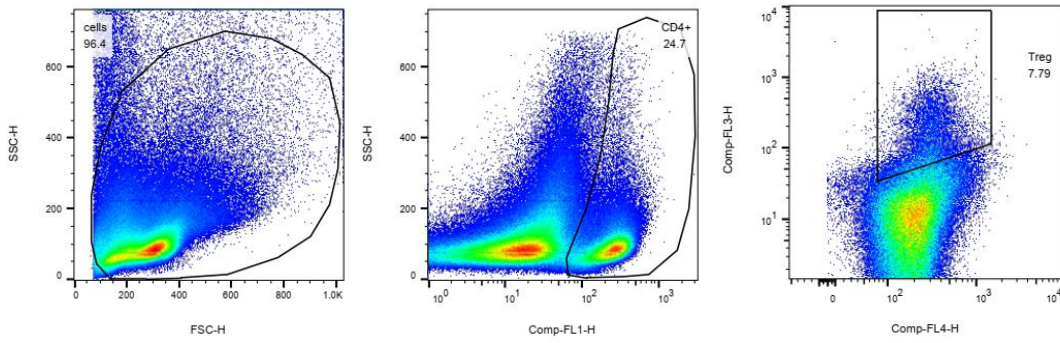

### Th17-Spleen

#### ABX

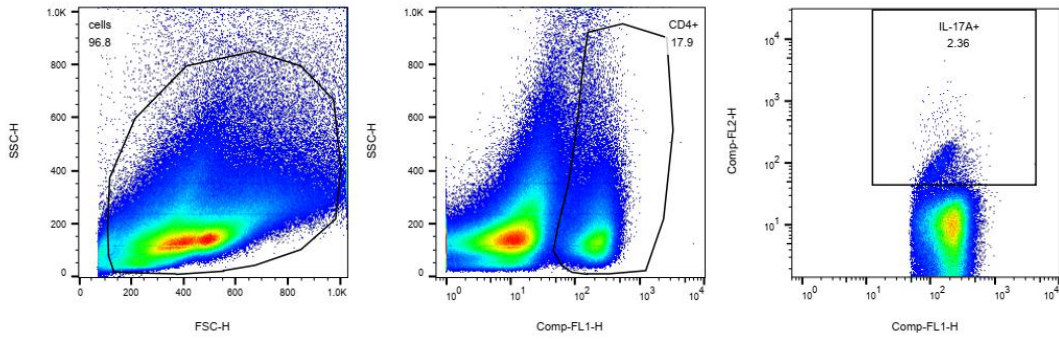

#### ABX(DSS)

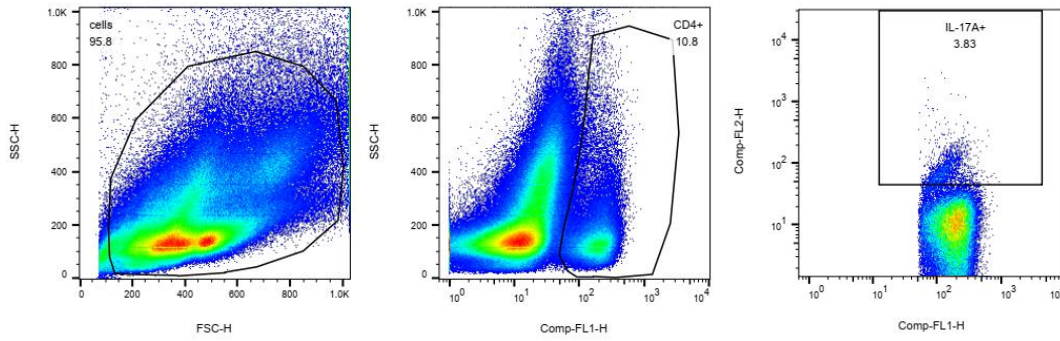



### ABX(DSS+GH)

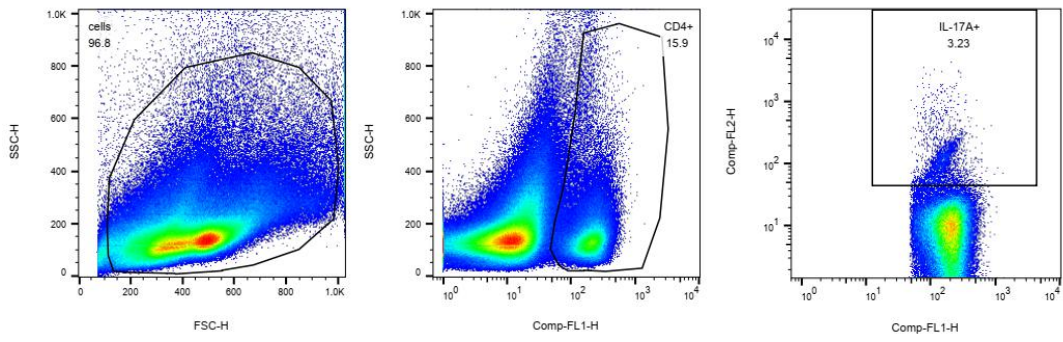

### Th17-MLN

#### ABX

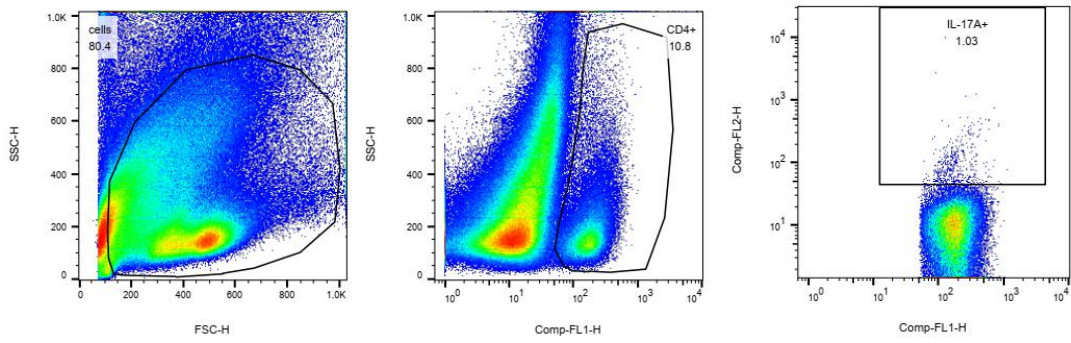

#### ABX(DSS)

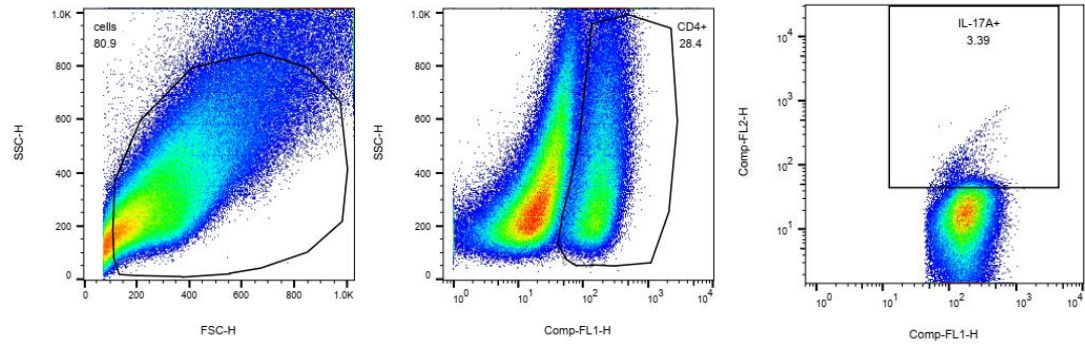

#### ABX(DSS+GH)

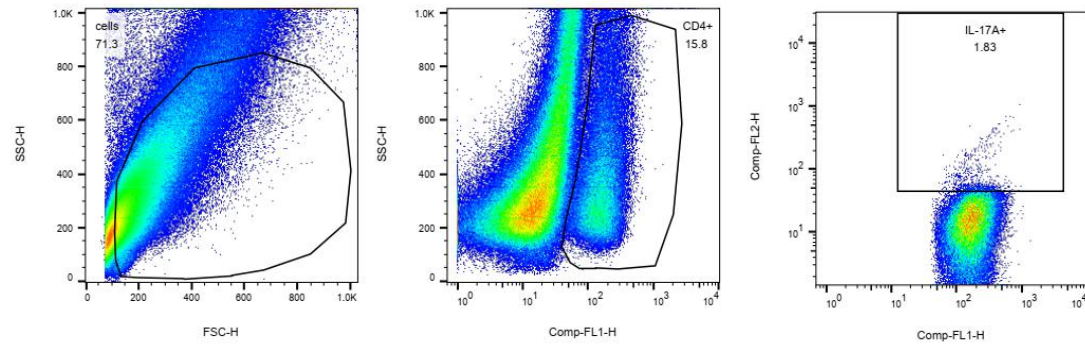

## Treg-Spleen

### FMTCON

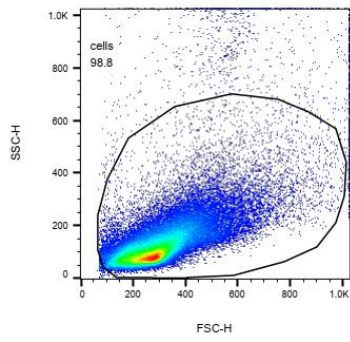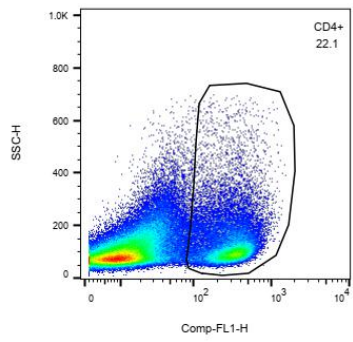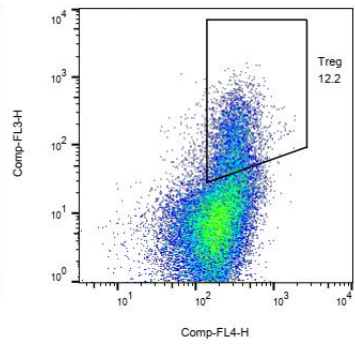

### FMTDSS

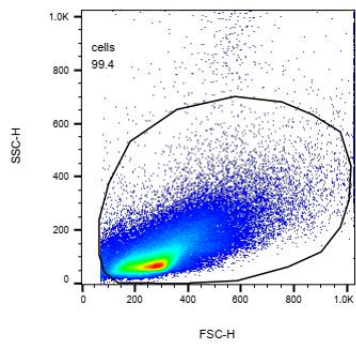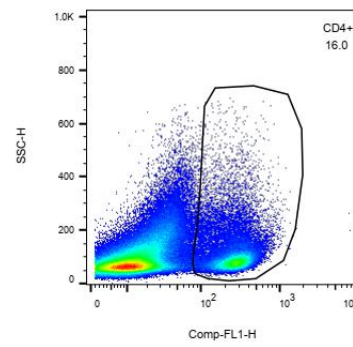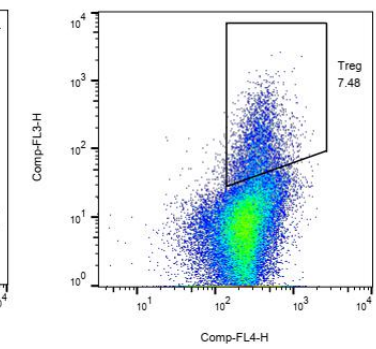

### FMTGH

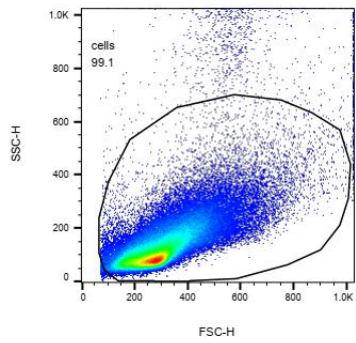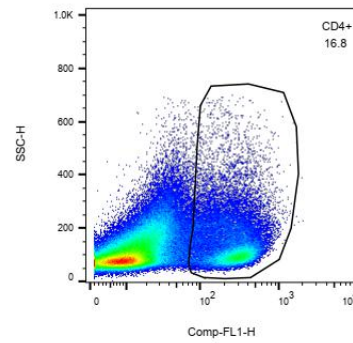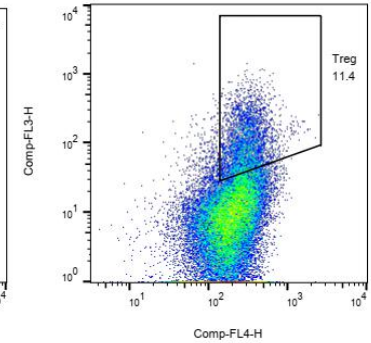

## Treg-MLN

### FMTCON

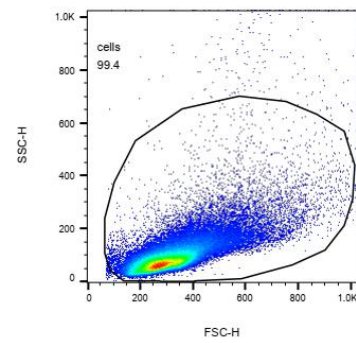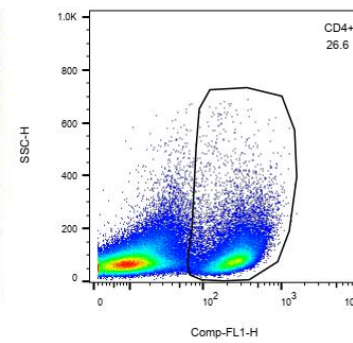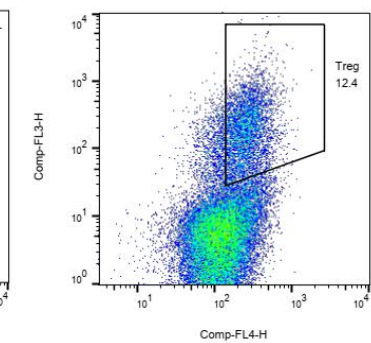



### FMTDSS

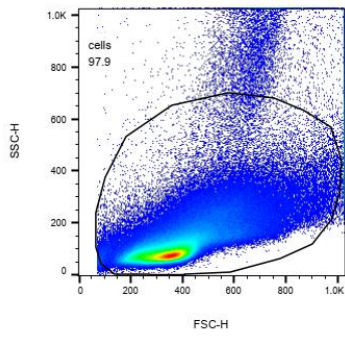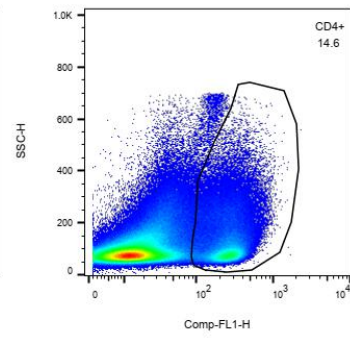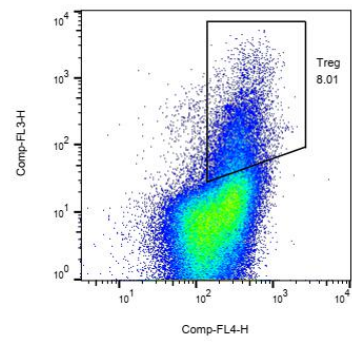

### FMTGH

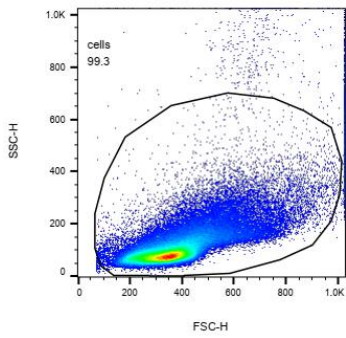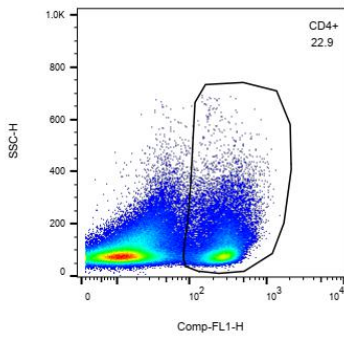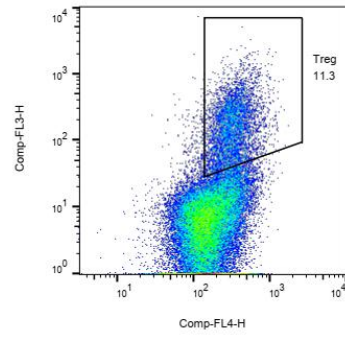

### Th17-Spleen

#### FMTCON

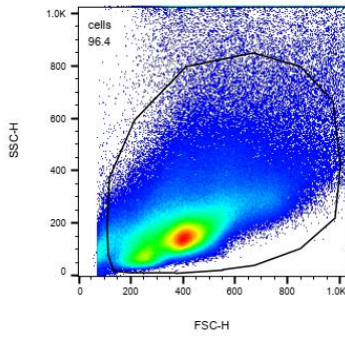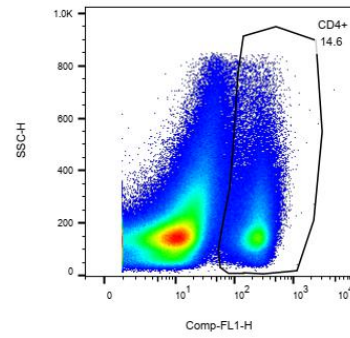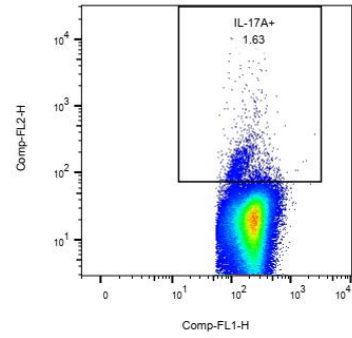

#### FMTDSS

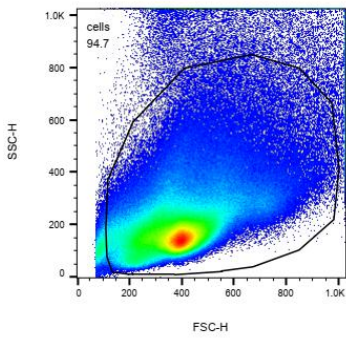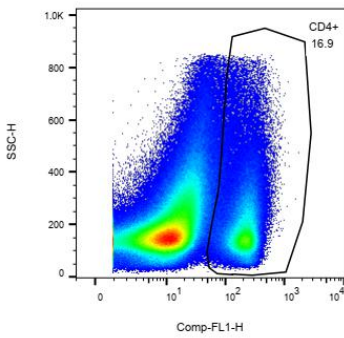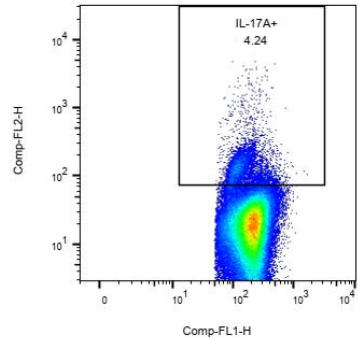

### FMTGH

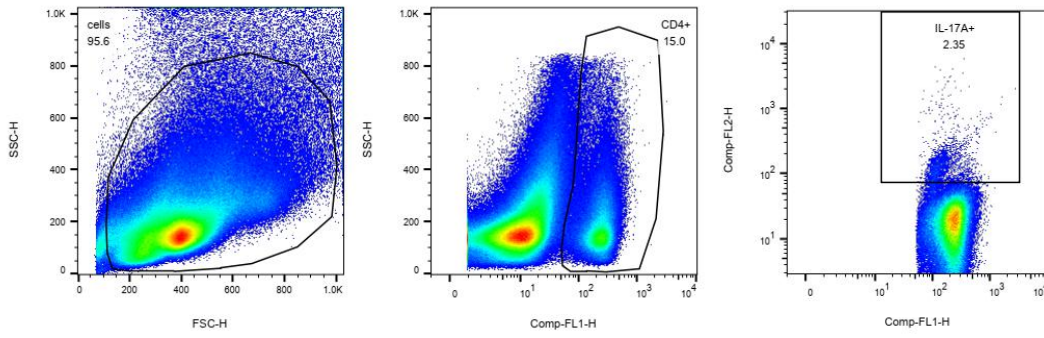

### Th17-MLN

### FMTCON

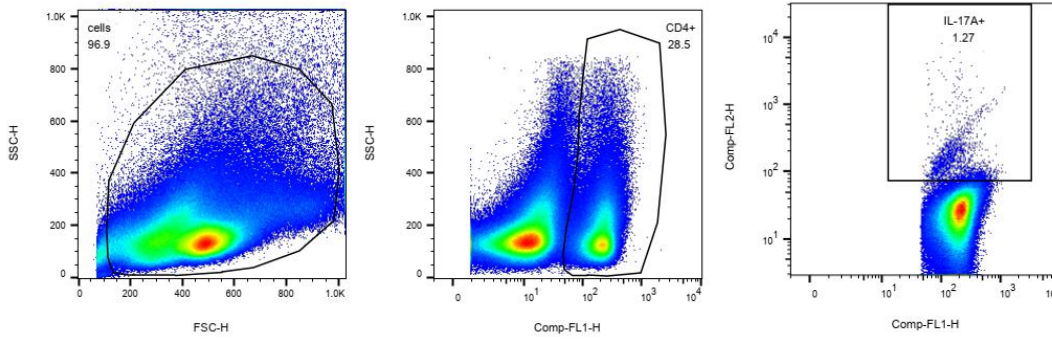

### FMTDSS

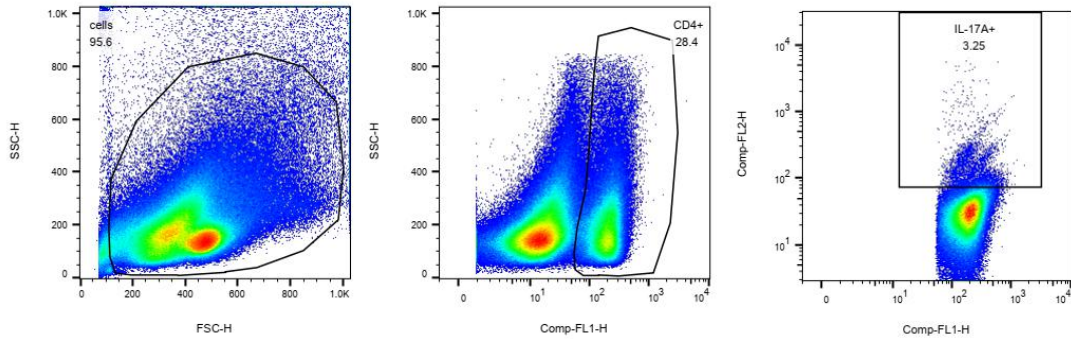

### FMTGH

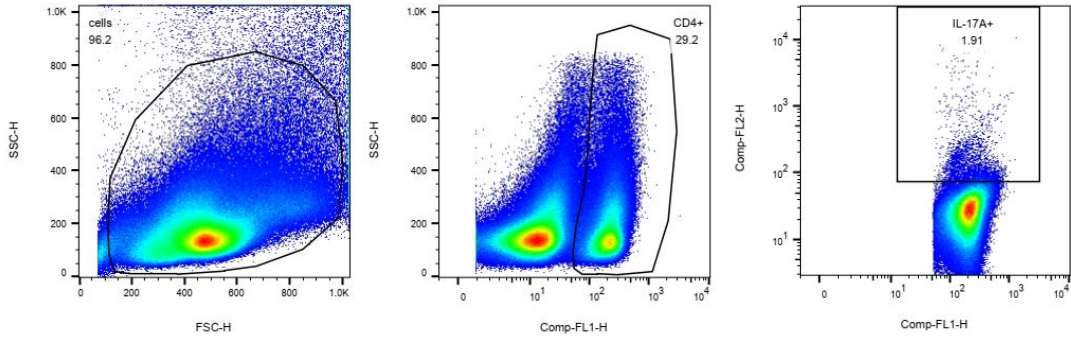

Supplement: DataSheet2.pdf [file DataSheet2.pdf]
