# Supplementary material for: Modified Gegen Qinlian Decoction Regulates Treg/Th17 Balance to Ameliorate DSS-Induced Acute Experimental Colitis in Mice by Altering the Gut Microbiota
Source: Front Pharmacol. 2021 Nov 4;12:756978. doi: 10.3389/fphar.2021.756978 (PMC8601377; doi:10.3389/fphar.2021.756978)
Supplement: Supplementary file 16 [file DataSheet3.XLSX]

## Sheet: Sheet1
Body weight from Day0-Day7
	GroupA												GroupB
	Control												DSS
Days	CON1	CON2	CON3	CON4	CON5	CON6	CON7	CON8	CON9	CON10		Days	DSS1	DSS2	DSS3	DSS4	DSS5	DSS6	DSS7	DSS8	DSS9	DSS10
0	22.56	22.7	23.41	22.01	22.54	23.07	23.84	22.47	23.27	22.67		0	23.64	22.24	23.57	21.95	21.92	24.54	23.27	23.25	23.14	23.92
1	22.57	22.64	23.85	21.68	22.23	23.6	23.38	22.38	23.36	22.92		1	23.87	23.06	23.96	22.44	22.7	25.33	23.4	23.91	23.7	24.47
2	23.38	23.59	24.08	22.16	23.02	23.72	24.06	22.69	23.47	23.12		2	23.67	22.64	24.38	22.57	22.56	25.03	23.58	24.16	23.66	24.21
3	23.26	23.7	24.11	22.03	22.88	23.51	24.12	22.62	23.25	23.14		3	23.66	22.34	23.67	22.41	21.98	25.04	23.52	23.81	23.24	24.4
4	22.97	23.14	24.07	22.36	22.76	23.63	24.28	22.84	23.48	23.52		4	23.44	22.7	22.52	21.12	21.12	24.5	23.41	death	22.83	24.13
5	22.7	22.79	24.24	22.19	22.74	23.69	24.25	22.94	23.66	23.78		5	22.9	21.89	21.04	20.13	21.16	22.88	21.79		21.44	22.45
6	22.66	22.65	24.34	22.15	22.94	23.85	24.58	22.97	23.35	23.76		6	21.92	21	20.06	18.52	20.26	death	22.67		21.27	21.17
7	23.26	23.49	25.01	22.76	23.69	23.92	24.65	23.31	23.75	23.74		7	20.28	20.07	18.33	16.56	18.76		21.32		18.71	19.35
	GroupC												GroupD
	GL												GM
Days	GL1	GL2	GL3	GL4	GL5	GL6	GL7	GL8	GL9	GL10		Days	GM1	GM2	GM3	GM4	GM5	GM6	GM7	GM8	GM9	GM10
0	23.32	24.26	21.94	23.07	22.63	22.13	21.62	22.46	21.41	21.54		0	22.08	21.36	21.34	22.33	21.7	21.69	21.23	22.64	20.91	21.31
1	23.76	24.73	21.89	22.66	22.42	22.13	21.76	22.78	21.89	21.46		1	21.73	20.86	21.04	21.86	21.72	21.37	21.38	22.58	20.56	21.23
2	24.18	24.86	22.25	22.48	22.68	22.18	21.71	22.45	21.75	20.88		2	21.98	19.83	21.11	22.34	21.98	21.74	20.55	22.83	19.82	21.55
3	24.47	24.94	19.87	20.8	21.34	20.43	20.61	19.68	19.42	18.82		3	22.33	17.99	18.41	22.45	19.44	19.33	18.98	23.2	18.07	21.45
4	24.41	24.58	22.07	23.05	22.71	19.89	21.79	22.09	18.74	21.79		4	22.39	18.48	18.23	22.94	20.25	21.63	21.5	22.83	21.09	21.43
5	23.63	23.92	21.54	22.12	22.23	20.09	21.57	21.64	17.1	death		5	22.01	18.8	19.16	22.91	19.7	21	21.33	22.92	20.58	20.87
6	22.31	23.64	19.77	21.51	22.58	20.95	20.88	20.06	16.66			6	20.89	19.76	19.42	22.38	20.22	21.09	20.46	21.77	19.89	19.64
7	22.19	22.74	19.13	19.29	20.85	19.75	19.45	19.62	death			7	19.37	19.58	18.51	20.67	19.23	19.31	18.19	21.87	death	death
	GroupE												GroupF
	GH												5-ASA
Days	GH1	GH2	GH3	GH4	GH5	GH6	GH7	GH8	GH9	GH10		Days	5-ASA1	5-ASA2	5-ASA3	5-ASA4	5-ASA5	5-ASA6	5-ASA7	5-ASA8	5-ASA9	5-ASA10
0	22.12	22.08	23.69	24.41	22.47	22.9	22.57	22.53	22.72	21.62		0	21.51	21.9	22.2	21.43	21.34	21.97	23.37	21.68	24.54	21.68
1	21.54	21.4	23.19	24.59	23.08	22.67	22.36	22.06	22.63	21.54		1	21.68	21.95	22.2	21.67	21.62	21.4	23.9	21.85	25.33	21.85
2	22.58	20.74	24.47	25.55	23.34	23.33	20.89	21.82	23.18	21.78		2	21.85	22.28	22.89	22.03	21.63	21.92	23.88	22.31	25.03	22.31
3	21.09	19.97	23.63	24.52	22.31	22.72	20.21	20.93	22.1	21.19		3	21.93	22.4	22.74	21.2	20.55	21.07	24.51	22.57	25.04	22.57
4	22.3	20.65	23.39	25.18	22.42	23	21.6	21.89	23.07	21.6		4	21.78	22.03	23.13	22.37	21.45	22.17	23.58	22.45	24.5	22.45
5	22.09	20.95	22.17	23.63	20.87	20.46	21.91	21.15	22.2	19.5		5	21.02	21.45	22.85	21.85	21.71	21.75	23.12	19.28	22.88	19.28
6	21.88	20.85	20.15	22.12	20.16	20.27	21.56	20.9	21.48	19.41		6	19.86	20.33	21.89	20.68	20.77	20.63	22.69	18	24.1	18
7	20.21	19.72	21.68	22.82	21.47	21.48	20.17	19.43	19.88	death		7	18.94	19.22	20.22	18.57	18.62	19.39	22.47	death	22.68	death
Figure1D. Statistics of colon length							Figure1F. The histological scores of mouse colon morphology
Control	DSS	GL	GM	GH	5-ASA		Control	DSS	GL	GM	GH	5-ASA
8.3	5.5	6.4	5.6	6.6	5.7		0	10	2	4	3	1
8.3	4.6	6.5	6	6	6.3		0	9	6	3	7	6
8.3	4.8	7	5.5	6	6.6		0	9	5	5	4	6
8.5	5.6	6	6	7.4	6		0	7	6	5	8	2
8.4	5	5.9	6.8	6.5	7		1	8	3	7	4	7
7.5	5	5.4	6.5	7.5	5		0	9	7	6	4	5
8.4	5	5.4	5.7	7	6.6		0	8	4	5	6	6
8	4.5	6	7.4	5.6	5.4		0	7	6	6	4	7
9.4
7.4
